# Supplementary material for: Fe3O4@COF(TAPT–DHTA) Nanocomposites as Magnetic Solid-Phase Extraction Adsorbents for Simultaneous Determination of 9 Mycotoxins in Fruits by UHPLC–MS/MS
Source: MDPI journal article supplement (doi:10.3390/toxins15020117), 2023-02-01
Supplement: s1 [file s1]

# Supplementary Materials: Fe<sub>3</sub>O<sub>4</sub>@COF(TAPT-DHTA) nanocomposites as magnetic solid-phase extraction adsorbents for simultaneous determination of 9 mycotoxins in fruits by UHPLC-MS/MS

Jie Wang <sup>1,2,†</sup>, Qingwen Huang <sup>2,†</sup>, Wenbo Guo <sup>2</sup>, Dakai Guo <sup>2</sup>, Zheng Han <sup>2</sup> and Dongxia Nie <sup>1,2,\*</sup>

<sup>1</sup> School of Health Science and Engineering, University of Shanghai for Science and Technology, Shanghai 200093, China

<sup>2</sup> Institute for Agro-Food Standards and Testing Technology, Shanghai Academy of Agricultural Sciences, Shanghai 201403, China

\* Correspondence: niedongxia@saas.sh.cn; Tel.: +86-21-37196975

† These authors contributed equally to the study.

Table S1. Structure and physicochemical parameters of 9 mycotoxins

Table S2. Mass spectrometry parameters of 9 mycotoxins

Table S3. Significance analysis of adsorbed solution

Table S4. Significance analysis of pH value of adsorbed solution

Table S5. Significance analysis of NaCl concentration in adsorbed solution

Table S6. Significance analysis of Adsorption time

Table S7. Significance analysis of adsorbent amount

Table S8. Significance analysis of elution kinds

Table S9. Significance analysis of Elution Volume

Table S10. Significance analysis of Elution time

Table S11. Comparison of the Fe<sub>3</sub>O<sub>4</sub>@COF(TAPT-DHTA) based MSPE method developed in this study with the sample pretreatment approaches reported in the previous studies.

Table S12. Contamination levels of 9 mycotoxins in five fruits (tomato, strawberry, watermelon, melon, hawthorn)

Table S13. Comparison between the developed UHPLC-MS/MS method and the reference methods by using tomato sample No. 7,14 and 20 (μg kg<sup>-1</sup>)

Figure S1. UV-Vis spectra of targeted mycotoxins, Fe<sub>3</sub>O<sub>4</sub>@COF(TAPT-DHTA) and mycotoxin/Fe<sub>3</sub>O<sub>4</sub>@COF(TAPT-DHTA)

Figure S2. Comparison of the purification efficiency of 9 mycotoxins in the spiked tomato sample by 8 candidate elution solutions

Figure S3. Effects of eluent volume on Fe<sub>3</sub>O<sub>4</sub>@COF (TAPT-DHTA) MSPE process

Figure S4. MRM chromatography of 9 mycotoxins in (A)solvent standard solution and (B) matrix standard solution ( $100 \mu\text{g kg}^{-1}$ ).

**Table S1.** Structure and physicochemical parameters of 9 mycotoxins

| Mycotoxins                            | Structure                                                                           | Molecular weight | pKa       | Molecular Formula                                             | Hydrogen Bond Donor Count | Hydrogen Bond Acceptor Count |
|---------------------------------------|-------------------------------------------------------------------------------------|------------------|-----------|---------------------------------------------------------------|---------------------------|------------------------------|
| Tenuazonic acid<br>(TeA)              | 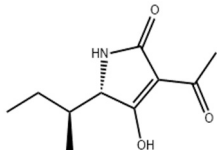   | 197.23           | 4.50±1.00 | C <sub>10</sub> H <sub>15</sub> NO <sub>3</sub>               | 2                         | 3                            |
| Alternariol<br>(AOH)                  |    | 258.23           | 7.16±0.20 | C <sub>14</sub> H <sub>10</sub> O <sub>5</sub>                | 3                         | 5                            |
| Tentoxin<br>(TEN)                     |   | 414.50           | –         | C <sub>22</sub> H <sub>30</sub> N <sub>4</sub> O <sub>4</sub> | 2                         | 4                            |
| Alternariol monomethyl ether<br>(AME) |  | 272.25           | 7.00±0.20 | C <sub>15</sub> H <sub>12</sub> O <sub>5</sub>                | 2                         | 5                            |
| Altenuene<br>(ALT)                    |  | 292.28           | 7.41±0.70 | C <sub>15</sub> H <sub>16</sub> O <sub>6</sub>                | 3                         | 6                            |

| Mycotoxins                                      | Structure                                                                          | Molecular weight | pKa       | Molecular Formula                                 | Hydrogen Bond Donor Count | Hydrogen Bond Acceptor Count |
|-------------------------------------------------|------------------------------------------------------------------------------------|------------------|-----------|---------------------------------------------------|---------------------------|------------------------------|
| Altenusin<br>(ALS)                              | 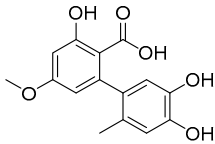  | 290.27           | 3.08±0.34 | C <sub>15</sub> H <sub>14</sub> O <sub>6</sub>    | 4                         | 6                            |
| Aflatoxin B <sub>1</sub><br>(AFB <sub>1</sub> ) |   | 312.27           | –         | C <sub>17</sub> H <sub>12</sub> O <sub>6</sub>    | 0                         | 6                            |
| Ochratoxin A<br>(OTA)                           |   | 403.81           | 3.40±0.10 | C <sub>20</sub> H <sub>18</sub> ClNO <sub>6</sub> | 3                         | 6                            |
| Zearalenone<br>(ZEN)                            |  | 318.40           | 7.58±0.40 | C <sub>18</sub> H <sub>22</sub> O <sub>5</sub>    | 2                         | 5                            |

**Table S2.** Mass spectrometry parameters of 9 mycotoxins

| Mycotoxins       | Precursor Ions<br>(m/z)  | Retention time<br>(min) | Product Ions<br>(m/z) | Dwell Time<br>(s) | Cone Voltage (V) | Collision Energy<br>(eV) |
|------------------|--------------------------|-------------------------|-----------------------|-------------------|------------------|--------------------------|
| TeA              | 198.1 [M+H] <sup>+</sup> | 1.75                    | 153.1058 <sup>a</sup> | 0.005             | 42               | 16                       |
|                  |                          |                         | 125.0214 <sup>b</sup> | 0.005             | 42               | 12                       |
| AOH              | 259.0 [M+H] <sup>+</sup> | 4.45                    | 185.1184 <sup>a</sup> | 0.005             | 64               | 28                       |
|                  |                          |                         | 213.1284 <sup>b</sup> | 0.005             | 64               | 24                       |
| AME              | 273.0 [M+H] <sup>+</sup> | 5.65                    | 258.0000 <sup>a</sup> | 0.012             | 54               | 26                       |
|                  |                          |                         | 128.0600 <sup>b</sup> | 0.012             | 54               | 25                       |
| ALT              | 292.9 [M+H] <sup>+</sup> | 3.64                    | 257.0693 <sup>a</sup> | 0.005             | 30               | 14                       |
|                  |                          |                         | 275.0738 <sup>b</sup> | 0.005             | 30               | 8                        |
| TEN              | 415.5 [M+H] <sup>+</sup> | 4.76                    | 132.1335 <sup>a</sup> | 0.005             | 14               | 34                       |
|                  |                          |                         | 256.2291 <sup>b</sup> | 0.005             | 14               | 34                       |
| ALS              | 288.8 [M-H] <sup>-</sup> | 2.62                    | 245.0728 <sup>a</sup> | 0.005             | 8                | 20                       |
|                  |                          |                         | 230.0566 <sup>b</sup> | 0.005             | 45               | 17                       |
| AFB <sub>1</sub> | 313.2 [M+H] <sup>+</sup> | 3.78                    | 241.1575 <sup>a</sup> | 0.009             | 74               | 36                       |
|                  |                          |                         | 284.9710 <sup>b</sup> | 0.009             | 74               | 22                       |
| OTA              | 404.3 [M+H] <sup>+</sup> | 4.28                    | 239.0344 <sup>a</sup> | 0.005             | 30               | 34                       |
|                  |                          |                         | 221.0280 <sup>b</sup> | 0.005             | 30               | 22                       |

---

|     |                          |      |                       |       |    |    |
|-----|--------------------------|------|-----------------------|-------|----|----|
| ZEN | 317.2 [M-H] <sup>-</sup> | 5.33 | 175.0464 <sup>a</sup> | 0.012 | 56 | 26 |
|     |                          |      | 131.0360 <sup>b</sup> | 0.012 | 56 | 24 |

---

<sup>a</sup> quantitation ion; <sup>b</sup> qualifier ions

**Table S3.** Significance analysis of adsorbed solution

| Mycotoxins       | Adsorption Solution (Recovery±SD %) |                          |                          |                           |                           |                         |
|------------------|-------------------------------------|--------------------------|--------------------------|---------------------------|---------------------------|-------------------------|
|                  | 0%                                  | 1%                       | 2%                       | 3%                        | 4%                        | 5%                      |
| TeA              | 67.88±4.55 <sup>b</sup>             | 82.77±5.31 <sup>a</sup>  | 61.51±6.51 <sup>bc</sup> | 56.64±3.63 <sup>cd</sup>  | 58.52±6.02 <sup>c</sup>   | 48.81±2.21 <sup>d</sup> |
| AOH              | 74.06±3.15 <sup>b</sup>             | 104.18±3.60 <sup>a</sup> | 69.66±1.62 <sup>bc</sup> | 74.10±5.59 <sup>b</sup>   | 67.32±6.41 <sup>bc</sup>  | 61.48±4.60 <sup>c</sup> |
| AME              | 81.23±10.28 <sup>b</sup>            | 99.62±5.91 <sup>a</sup>  | 80.73±11.58 <sup>b</sup> | 79.31±4.54 <sup>b</sup>   | 54.19±6.29 <sup>c</sup>   | 40.48±5.12 <sup>c</sup> |
| TEN              | 69.31±5.76 <sup>b</sup>             | 87.71±12.93 <sup>a</sup> | 42.84±2.48 <sup>c</sup>  | 34.68±3.93 <sup>cd</sup>  | 28.26±4.66 <sup>de</sup>  | 20.79±2.74 <sup>e</sup> |
| ALT              | 65.74±3.22 <sup>b</sup>             | 87.50±8.3 <sup>a</sup>   | 34.76±1.79 <sup>c</sup>  | 28.58±4.6 <sup>cd</sup>   | 25.53±1.18 <sup>d</sup>   | 20.71±1.57 <sup>d</sup> |
| ALS              | 63.29±4.93 <sup>b</sup>             | 85.81±12.76 <sup>a</sup> | 53.21±6.89 <sup>b</sup>  | 33.83±3.17 <sup>c</sup>   | 20.70±2.87 <sup>d</sup>   | 15.47±2.86 <sup>d</sup> |
| AFB <sub>1</sub> | 74.50±7.50 <sup>ab</sup>            | 79.15±9.81 <sup>ab</sup> | 81.32±8.69 <sup>a</sup>  | 72.99±9.95 <sup>ab</sup>  | 64.18±9.76 <sup>bc</sup>  | 55.54±5.03 <sup>c</sup> |
| OTA              | 87.73±3.66 <sup>a</sup>             | 90.71±2.66 <sup>a</sup>  | 79.62±4.22 <sup>ab</sup> | 79.86±14.06 <sup>ab</sup> | 60.09±11.08 <sup>bc</sup> | 46.78±8.03 <sup>c</sup> |
| ZEN              | 77.34±2.40 <sup>bc</sup>            | 95.94±6.18 <sup>a</sup>  | 91.45±5.87 <sup>ab</sup> | 85.69±10.75 <sup>ab</sup> | 65.70±12.43 <sup>cd</sup> | 54.05±4.43 <sup>d</sup> |

**Table S4.** Significance analysis of pH value of adsorbed solution

| Mycotoxins       | pH of Adsorption Solution (Recovery±SD %) |                          |                          |                          |                          |                          |
|------------------|-------------------------------------------|--------------------------|--------------------------|--------------------------|--------------------------|--------------------------|
|                  | pH=3                                      | pH=4                     | pH=5                     | pH=6                     | pH=7                     | pH=8                     |
| TeA              | 62.15±10.15 <sup>b</sup>                  | 83.01±4.11 <sup>a</sup>  | 61.26±7.34 <sup>b</sup>  | 54.28±2.44 <sup>bc</sup> | 48.93±3.32 <sup>c</sup>  | 50.50±2.89 <sup>c</sup>  |
| AOH              | 83.49±7.06 <sup>ab</sup>                  | 95.99±7.95 <sup>a</sup>  | 94.92±1.23 <sup>a</sup>  | 83.86±4.26 <sup>ab</sup> | 79.01±8.35 <sup>ab</sup> | 71.14±1.11 <sup>b</sup>  |
| AME              | 94.96±7.36 <sup>a</sup>                   | 104.51±5.25 <sup>a</sup> | 83.36±4.24 <sup>ab</sup> | 66.26±0.87 <sup>bc</sup> | 51.31±11.75 <sup>c</sup> | 47.87±11.26 <sup>c</sup> |
| TEN              | 74.34±5.19 <sup>b</sup>                   | 89.95±6.48 <sup>a</sup>  | 92.88±4.96 <sup>a</sup>  | 81.03±2.08 <sup>ab</sup> | 54.14±1.31 <sup>c</sup>  | 50.55±4.46 <sup>c</sup>  |
| ALT              | 57.45±3.82 <sup>b</sup>                   | 87.64±9.59 <sup>a</sup>  | 68.03±1.13 <sup>b</sup>  | 68.52±8.17 <sup>b</sup>  | 67.94±3.59 <sup>b</sup>  | 62.89±11.75 <sup>b</sup> |
| ALS              | 64.06±9.09 <sup>b</sup>                   | 82.81±4.02 <sup>a</sup>  | 83.79±1.88 <sup>a</sup>  | 63.01±5.34 <sup>b</sup>  | 54.50±0.88 <sup>c</sup>  | 51.20±1.70 <sup>c</sup>  |
| AFB <sub>1</sub> | 57.98±1.04 <sup>b</sup>                   | 76.42±3.92 <sup>a</sup>  | 55.95±0.70 <sup>b</sup>  | 39.09±0.62 <sup>c</sup>  | 39.30±3.25 <sup>c</sup>  | 36.93±4.58 <sup>c</sup>  |
| OTA              | 50.43±3.84 <sup>b</sup>                   | 88.29±0.93 <sup>a</sup>  | 53.94±0.62 <sup>b</sup>  | 39.42±1.07 <sup>c</sup>  | 41.15±5.64 <sup>c</sup>  | 28.23±1.07 <sup>d</sup>  |
| ZEN              | 63.94±3.70 <sup>b</sup>                   | 92.12±6.32 <sup>a</sup>  | 62.07±5.13 <sup>b</sup>  | 40.19±2.91 <sup>c</sup>  | 34.67±3.86 <sup>c</sup>  | 33.96±0.86 <sup>c</sup>  |

**Table S5.** Significance analysis of NaCl concentration in adsorbed solution

| Mycotoxins       | Concentration of NaCl (Recovery±SD %) |                         |                          |                           |                          |                         |
|------------------|---------------------------------------|-------------------------|--------------------------|---------------------------|--------------------------|-------------------------|
|                  | 0 mg mL <sup>-1</sup>                 | 2 mg mL <sup>-1</sup>   | 4 mg mL <sup>-1</sup>    | 6 mg mL <sup>-1</sup>     | 8 mg mL <sup>-1</sup>    | 10 mg mL <sup>-1</sup>  |
| TeA              | 85.10±10.52 <sup>a</sup>              | 76.62±1.64 <sup>b</sup> | 67.87±3.04 <sup>c</sup>  | 62.54±1.39 <sup>c</sup>   | 59.34±1.33 <sup>c</sup>  | 49.91±2.48 <sup>d</sup> |
| AOH              | 103.11±5.38 <sup>a</sup>              | 95.00±7.56 <sup>a</sup> | 81.63±3.99 <sup>ab</sup> | 71.01±2.99 <sup>b</sup>   | 59.63±3.05 <sup>bc</sup> | 43.69±4.25 <sup>c</sup> |
| AME              | 100.28±5.87 <sup>a</sup>              | 95.88±2.09 <sup>a</sup> | 61.61±4.72 <sup>b</sup>  | 54.77±10.44 <sup>bc</sup> | 47.84±1.35 <sup>c</sup>  | 43.84±7.11 <sup>c</sup> |
| TEN              | 94.67±6.53 <sup>a</sup>               | 73.01±5.57 <sup>b</sup> | 69.21±1.79 <sup>b</sup>  | 58.18±4.38 <sup>c</sup>   | 55.36±3.71 <sup>cd</sup> | 47.92±3.30 <sup>d</sup> |
| ALT              | 83.22±2.68 <sup>a</sup>               | 69.68±5.56 <sup>b</sup> | 63.43±2.09 <sup>c</sup>  | 68.46±1.48 <sup>bc</sup>  | 72.07±4.47 <sup>b</sup>  | 54.96±0.57 <sup>d</sup> |
| ALS              | 84.88±8.35 <sup>a</sup>               | 75.66±4.23 <sup>a</sup> | 60.68±5.88 <sup>b</sup>  | 55.42±4.90 <sup>b</sup>   | 54.07±2.97 <sup>b</sup>  | 59.46±4.12 <sup>b</sup> |
| AFB <sub>1</sub> | 76.83±3.76 <sup>a</sup>               | 65.97±7.32 <sup>b</sup> | 64.89±3.53 <sup>b</sup>  | 58.69±6.10 <sup>bc</sup>  | 49.10±1.57 <sup>cd</sup> | 43.52±5.01 <sup>d</sup> |
| OTA              | 87.43±2.43 <sup>a</sup>               | 61.69±0.50 <sup>b</sup> | 59.38±3.17 <sup>b</sup>  | 48.51±6.29 <sup>c</sup>   | 35.55±5.50 <sup>d</sup>  | 36.71±2.77 <sup>d</sup> |
| ZEN              | 94.10±6.01 <sup>a</sup>               | 62.32±7.32 <sup>b</sup> | 49.90±5.80 <sup>c</sup>  | 41.82±0.72 <sup>cd</sup>  | 35.48±2.34 <sup>de</sup> | 29.85±1.15 <sup>e</sup> |

**Table S6.** Significance analysis of Adsorption time

| Mycotoxins       | Adsorption time (Recovery±SD %) |                         |                         |                          |                          |
|------------------|---------------------------------|-------------------------|-------------------------|--------------------------|--------------------------|
|                  | 2 min                           | 4 min                   | 6 min                   | 8 min                    | 10 min                   |
| TeA              | 22.73±5.42 <sup>d</sup>         | 49.39±5.19 <sup>c</sup> | 72.92±8.54 <sup>b</sup> | 88.30±11.50 <sup>a</sup> | 88.79±4.91 <sup>a</sup>  |
| AOH              | 41.34±5.65 <sup>d</sup>         | 59.93±4.12 <sup>c</sup> | 82.08±7.92 <sup>b</sup> | 96.43±4.57 <sup>a</sup>  | 95.80±7.52 <sup>a</sup>  |
| AME              | 32.58±2.22 <sup>d</sup>         | 46.02±2.27 <sup>c</sup> | 74.66±1.91 <sup>b</sup> | 96.58±1.55 <sup>a</sup>  | 99.66±4.02 <sup>a</sup>  |
| TEN              | 31.00±1.00 <sup>d</sup>         | 62.92±1.10 <sup>c</sup> | 74.50±8.64 <sup>b</sup> | 95.97±0.72 <sup>a</sup>  | 92.66±8.90 <sup>a</sup>  |
| ALT              | 53.48±4.49 <sup>b</sup>         | 76.77±9.62 <sup>a</sup> | 88.26±8.01 <sup>a</sup> | 85.46±7.79 <sup>a</sup>  | 93.18±1.74 <sup>a</sup>  |
| ALS              | 49.84±3.18 <sup>b</sup>         | 61.23±8.91 <sup>b</sup> | 79.39±4.90 <sup>a</sup> | 89.42±1.79 <sup>a</sup>  | 93.76±9.50 <sup>a</sup>  |
| AFB <sub>1</sub> | 19.75±11.71 <sup>b</sup>        | 31.63±6.87 <sup>b</sup> | 64.74±0.31 <sup>a</sup> | 78.16±2.73 <sup>a</sup>  | 77.41±4.22 <sup>a</sup>  |
| OTA              | 49.23±8.70 <sup>c</sup>         | 65.93±5.84 <sup>b</sup> | 72.23±7.82 <sup>b</sup> | 91.29±6.68 <sup>a</sup>  | 86.36±8.04 <sup>a</sup>  |
| ZEN              | 29.34±1.29 <sup>c</sup>         | 36.57±1.91 <sup>c</sup> | 58.31±5.81 <sup>b</sup> | 94.87±7.99 <sup>a</sup>  | 101.09±5.72 <sup>a</sup> |



**Table S7.** Significance analysis of adsorbent amount

| Mycotoxins       | The amount of adsorbent (Recovery±SD %) |                          |                          |                          |                           |
|------------------|-----------------------------------------|--------------------------|--------------------------|--------------------------|---------------------------|
|                  | 10 mg                                   | 15 mg                    | 20 mg                    | 25 mg                    | 30 mg                     |
| TeA              | 71.26±4.03 <sup>c</sup>                 | 85.57±4.75 <sup>ab</sup> | 90.58±8.38 <sup>a</sup>  | 88.27±1.05 <sup>ab</sup> | 75.02±2.30 <sup>bc</sup>  |
| AOH              | 59.90±2.87 <sup>d</sup>                 | 69.81±3.21 <sup>c</sup>  | 96.95±2.56 <sup>a</sup>  | 72.97±1.18 <sup>bc</sup> | 74.39±1.13 <sup>b</sup>   |
| AME              | 63.38±2.82 <sup>c</sup>                 | 75.14±0.26 <sup>b</sup>  | 96.49±5.08 <sup>a</sup>  | 83.07±7.95 <sup>b</sup>  | 76.78±8.78 <sup>b</sup>   |
| TEN              | 68.41±3.44 <sup>b</sup>                 | 70.17±1.49 <sup>b</sup>  | 87.73±6.07 <sup>a</sup>  | 69.85±0.94 <sup>b</sup>  | 67.92±0.61 <sup>b</sup>   |
| ALT              | 68.79±3.66 <sup>c</sup>                 | 75.97±9.37 <sup>bc</sup> | 90.63±3.29 <sup>a</sup>  | 83.79±2.16 <sup>ab</sup> | 81.46±2.58 <sup>ab</sup>  |
| ALS              | 64.40±1.99 <sup>b</sup>                 | 72.28±5.09 <sup>b</sup>  | 82.32±8.99 <sup>a</sup>  | 76.08±4.34 <sup>b</sup>  | 79.34±5.31 <sup>b</sup>   |
| AFB <sub>1</sub> | 35.83±0.99 <sup>c</sup>                 | 54.81±0.68 <sup>b</sup>  | 75.26±0.81 <sup>a</sup>  | 73.63±1.28 <sup>a</sup>  | 77.81±6.10 <sup>a</sup>   |
| OTA              | 45.47±4.09 <sup>b</sup>                 | 48.52±1.38 <sup>b</sup>  | 83.80±7.59 <sup>a</sup>  | 72.22±5.67 <sup>a</sup>  | 76.53±7.57 <sup>a</sup>   |
| ZEN              | 58.40±6.36 <sup>c</sup>                 | 75.73±0.92 <sup>b</sup>  | 97.18±11.02 <sup>a</sup> | 86.47±3.09 <sup>ab</sup> | 84.37±10.31 <sup>ab</sup> |

**Table S8.** Significance analysis of elution kinds

| Mycotoxins       | The kinds of Elution solvent (Recovery±SD %) |                           |                           |                          |                            |                          |                           |                          |
|------------------|----------------------------------------------|---------------------------|---------------------------|--------------------------|----------------------------|--------------------------|---------------------------|--------------------------|
|                  | A                                            | B                         | C                         | D                        | E                          | F                        | G                         | H                        |
| TeA              | 81.93±3.98 <sup>b</sup>                      | 45.03±7.73 <sup>d</sup>   | 79.90±0.52 <sup>b</sup>   | 55.31±5.38 <sup>cd</sup> | 68.78±1.74 <sup>bc</sup>   | 72.75±6.43 <sup>b</sup>  | 106.28±3.42 <sup>a</sup>  | 66.81±8.84 <sup>bc</sup> |
| AOH              | 99.82±9.16 <sup>ab</sup>                     | 103.53±6.22 <sup>ab</sup> | 94.33±1.87 <sup>abc</sup> | 93.29±6.94 <sup>bc</sup> | 81.73±8.30 <sup>cd</sup>   | 82.12±1.25 <sup>cd</sup> | 107.33±5.08 <sup>a</sup>  | 76.05±2.60 <sup>d</sup>  |
| AME              | 98.92±6.83 <sup>a</sup>                      | 72.39±2.97 <sup>cde</sup> | 70.19±2.47 <sup>de</sup>  | 75.16±1.97 <sup>cd</sup> | 85.18±0.73 <sup>b</sup>    | 78.83±6.26 <sup>bc</sup> | 93.64±6.23 <sup>a</sup>   | 65.49±2.96 <sup>e</sup>  |
| TEN              | 91.04±7.38 <sup>a</sup>                      | 66.18±4.34 <sup>d</sup>   | 74.69±3.87 <sup>cd</sup>  | 89.22±2.46 <sup>ab</sup> | 80.64±0.77 <sup>bc</sup>   | 78.20±5.03 <sup>c</sup>  | 83.33±7.55 <sup>abc</sup> | 77.78±4.42 <sup>c</sup>  |
| ALT              | 89.25±2.61 <sup>a</sup>                      | 52.42±8.83 <sup>bcd</sup> | 65.96±5.28 <sup>bc</sup>  | 60.23±5.22 <sup>bc</sup> | 64.08±4.38 <sup>b</sup>    | 47.28±7.59 <sup>cd</sup> | 90.35±5.02 <sup>a</sup>   | 44.5±6.07 <sup>d</sup>   |
| ALS              | 86.21±3.99 <sup>a</sup>                      | 67.46±3.54 <sup>bc</sup>  | 76.44±0.72 <sup>ab</sup>  | 76.22±4.82 <sup>ab</sup> | 72.05±1.002 <sup>abc</sup> | 38.36±6.47 <sup>d</sup>  | 86.62±2.75 <sup>a</sup>   | 58.69±5.44 <sup>c</sup>  |
| AFB <sub>1</sub> | 80.86±1.53 <sup>a</sup>                      | 70.52±8.59 <sup>b</sup>   | 64.74±0.31 <sup>bc</sup>  | 61.49±2.73 <sup>c</sup>  | 40.19±2.51 <sup>de</sup>   | 35.23±0.64 <sup>e</sup>  | 72.19±8.54 <sup>b</sup>   | 45.04±0.89 <sup>d</sup>  |
| OTA              | 87.69±5.48 <sup>a</sup>                      | 71.48±6.72 <sup>bc</sup>  | 61.12±1.89 <sup>c</sup>   | 80.18±2.87 <sup>ab</sup> | 62.47±2.15 <sup>bc</sup>   | 43.32±1.42 <sup>d</sup>  | 87.36±1.42 <sup>a</sup>   | 44.39±1.85 <sup>d</sup>  |
| ZEN              | 94.24±3.43 <sup>a</sup>                      | 69.91±1.91 <sup>b</sup>   | 65.53±0.51 <sup>b</sup>   | 72.65±4.95 <sup>b</sup>  | 67.76±5.72 <sup>b</sup>    | 66.07±0.73 <sup>b</sup>  | 68.23±8.63 <sup>b</sup>   | 53.85±7.39 <sup>c</sup>  |

(A) Methanol, (B) Acetonitrile, (C) Methanol/Formic acid (99/1), (D) Acetonitrile/Formic acid (99/1), (E) Methanol/Acetonitrile/Formic acid (50/49/1), (F) Methanol/Acetonitrile/Ammonium hydroxide (50/49/1), (G) Methanol/Acetonitrile/Formic acid (80/19/1), (H) Methanol/Acetonitrile/Ammonium hydroxide (80/19/1)

**Table S9.** Significance analysis of Elution Volume

|                  | 3 mL                     | 9 mL                      | 15 mL                   |
|------------------|--------------------------|---------------------------|-------------------------|
| TeA              | 88.15±7.30 <sup>a</sup>  | 80.53±3.95 <sup>a</sup>   | 80.65±7.49 <sup>a</sup> |
| AOH              | 99.69±2.73 <sup>a</sup>  | 84.97±2.63 <sup>a</sup>   | 93.91±1.66 <sup>a</sup> |
| AME              | 96.80±3.02 <sup>a</sup>  | 104.35±5.29 <sup>a</sup>  | 98.41±3.92 <sup>a</sup> |
| TEN              | 88.99±7.09 <sup>ab</sup> | 82.04±3.49 <sup>b</sup>   | 94.90±2.21 <sup>a</sup> |
| ALT              | 83.41±3.99 <sup>a</sup>  | 71.26±3.24 <sup>a</sup>   | 67.62±7.81 <sup>a</sup> |
| ALS              | 81.39±8.74 <sup>a</sup>  | 86.55±4.75 <sup>a</sup>   | 83.93±2.73 <sup>a</sup> |
| AFB <sub>1</sub> | 78.40±5.08 <sup>a</sup>  | 75.67±0.34 <sup>a</sup>   | 76.39±1.20 <sup>a</sup> |
| OTA              | 88.85±3.48 <sup>a</sup>  | 89.31±7.16 <sup>a</sup>   | 81.88±6.15 <sup>a</sup> |
| ZEN              | 98.6±5.71 <sup>ab</sup>  | 103.88±10.15 <sup>a</sup> | 84.70±3.06 <sup>b</sup> |

**Table S10.** Significance analysis of Elution time

| Mycotoxins       | Elution time (Recovery±SD %) |                          |                           |                          |                          |
|------------------|------------------------------|--------------------------|---------------------------|--------------------------|--------------------------|
|                  | 1 min                        | 2 min                    | 3 min                     | 4 min                    | 5 min                    |
| TeA              | 38.49±3.30 <sup>c</sup>      | 65.98±2.38 <sup>b</sup>  | 70.14±3.29 <sup>b</sup>   | 91.19±1.98 <sup>a</sup>  | 90.06±2.70 <sup>a</sup>  |
| AOH              | 42.29±6.55 <sup>c</sup>      | 76.57±7.40 <sup>b</sup>  | 103.03±10.37 <sup>a</sup> | 101.99±6.40 <sup>a</sup> | 99.96±5.85 <sup>a</sup>  |
| AME              | 48.12±2.97 <sup>c</sup>      | 64.14±5.67 <sup>b</sup>  | 99.39±7.20 <sup>a</sup>   | 103.62±2.06 <sup>a</sup> | 100.29±5.14 <sup>a</sup> |
| TEN              | 37.85±0.93 <sup>c</sup>      | 63.64±0.27 <sup>b</sup>  | 85.58±0.87 <sup>a</sup>   | 86.26±0.60 <sup>a</sup>  | 83.34±1.44 <sup>a</sup>  |
| ALT              | 41.53±4.79 <sup>c</sup>      | 54.18±5.08 <sup>b</sup>  | 82.20±2.27 <sup>a</sup>   | 88.02±7.98 <sup>a</sup>  | 83.44±6.11 <sup>a</sup>  |
| ALS              | 40.69±2.85 <sup>b</sup>      | 65.91±6.75 <sup>a</sup>  | 72.07±4.50 <sup>a</sup>   | 80.22±9.80 <sup>a</sup>  | 81.76±5.85 <sup>a</sup>  |
| AFB <sub>1</sub> | 33.26±4.93 <sup>c</sup>      | 52.23±8.38 <sup>c</sup>  | 65.50±6.30 <sup>a</sup>   | 75.08±3.05 <sup>a</sup>  | 77.34±4.96 <sup>a</sup>  |
| OTA              | 32.77±1.78 <sup>c</sup>      | 59.66±6.41 <sup>b</sup>  | 64.28±7.4 <sup>b</sup>    | 90.96±1.50 <sup>a</sup>  | 87.81±3.07 <sup>a</sup>  |
| ZEN              | 41.35±1.54 <sup>c</sup>      | 51.78±3.74 <sup>bc</sup> | 59.41±2.97 <sup>b</sup>   | 96.71±8.00 <sup>a</sup>  | 97.80±3.68 <sup>a</sup>  |

**Table S11.** Comparison of the Fe<sub>3</sub>O<sub>4</sub>@COF(TAPT-DHTA) based MSPE method developed in this study with the sample pretreatment approaches reported in the previous studies.

| Mycotoxins                                                                           | Matrix                                          | Sorbent                                                              | Sample pretreatment | Analytical technique | Adsorption/ Elution time of MSPE (min) | Recovery (%) | LOD (µg kg <sup>-1</sup> ) | Ref.      |
|--------------------------------------------------------------------------------------|-------------------------------------------------|----------------------------------------------------------------------|---------------------|----------------------|----------------------------------------|--------------|----------------------------|-----------|
| FB <sub>1</sub> , ZON, OTA                                                           | maize oil, rapeseed oil, soybean oil            | Fe <sub>3</sub> O <sub>4</sub> @nSiO <sub>2</sub> @mSiO <sub>2</sub> | MSPE                | UPLC–MS/MS           | 10/5                                   | 89.40-97.10  | 0.08-1.03                  | [1]       |
| AFB <sub>1</sub> , AFB <sub>2</sub> , AFG <sub>1</sub> , AFG <sub>2</sub> , OTA, OTB | vegetable oils                                  | PDA@Fe <sub>3</sub> O <sub>4</sub> -MWCNTs                           | MSPE                | HPLC–FLD             | 10/3                                   | 70.15-89.25  | 0.20-0.50                  | [2]       |
| AFB <sub>1</sub> , ZON                                                               | Wheat flour                                     | Fe <sub>3</sub> O <sub>4</sub> -MWCNTs-NH <sub>2</sub>               | MSPE                | HPLC                 | 25/15                                  | 88.80-96.00  | 0.15-0.24                  | [3]       |
| AFB <sub>1</sub> , AFG <sub>1</sub> , STER, ZEN, OTA                                 | licorice                                        | Fe <sub>3</sub> O <sub>4</sub> @PDA/MIL-101(Cr)                      | MSPE                | UHPLC–MS/MS          | 30/2                                   | 78.53-116.28 | 0.01–0.09                  | [4]       |
| AOH, AME, TEN, TeA                                                                   | jujube                                          | MgSO <sub>4</sub> , NaCl                                             | QuEChERS            | UPLC–MS/MS           |                                        | 83.50-109.60 | 0.14-0.26                  | [5]       |
| AOH, AME, TEN, TeA                                                                   | tomato, fruit-based products                    | MgSO <sub>4</sub> , NaCl                                             | QuEChERS            | LC–MS/MS             |                                        | 98.80-108.90 | 0.25-20.00                 | [6]       |
| AOH, AME, TEN, TeA, ALT                                                              | wolfberry                                       | C18                                                                  | QuEChERS            | UPLC–MS/MS           |                                        | 73.80-111.50 | 0.07-0.24                  | [7]       |
| 9 mycotoxins                                                                         | Tomato, Strawberry, Watermelon, Melon, Hawthorn | Fe <sub>3</sub> O <sub>4</sub> @COF(TAPT–DHTA)                       | MSPE                | UHPLC–MS/MS          | 8/4                                    | 74.25-111.75 | 0.01-0.50                  | This work |

**Table S12.** Contamination levels of 9 mycotoxins in five fruits (tomato, strawberry, watermelon, melon, hawthorn)

| Mycotoxins       | Tomato                 |                                         | Strawberry             |                                         | Watermelon             |                                         | Melon                  |                                         | Hawthorn               |                                         |
|------------------|------------------------|-----------------------------------------|------------------------|-----------------------------------------|------------------------|-----------------------------------------|------------------------|-----------------------------------------|------------------------|-----------------------------------------|
|                  | Positive/Total samples | Content range ( $\mu\text{g kg}^{-1}$ ) | Positive/Total samples | Content range ( $\mu\text{g kg}^{-1}$ ) | Positive/Total samples | Content range ( $\mu\text{g kg}^{-1}$ ) | Positive/Total samples | Content range ( $\mu\text{g kg}^{-1}$ ) | Positive/Total samples | Content range ( $\mu\text{g kg}^{-1}$ ) |
| TeA              | 10/20                  | 3.8-6.5                                 | 9/20                   | 1.9-5.6                                 | 0/20                   | ND <sup>a</sup>                         | 1/20                   | <LOQ                                    | 0/20                   | ND                                      |
| AOH              | 2/20                   | 3.05-4.0                                | 3/20                   | 4.9-20.0                                | 1/20                   | <LOQ                                    | 0/20                   | ND                                      | 5/20                   | 3.7-14.2                                |
| AME              | 0/20                   | ND                                      | 0/20                   | ND                                      | 0/20                   | ND                                      | 1/20                   | 1.4                                     | 6/20                   | 10.9-16.8                               |
| TEN              | 1/20                   | 18.2                                    | 0/20                   | ND                                      | 0/20                   | ND                                      | 0/20                   | ND                                      | 3/20                   | 0.6-1.3                                 |
| ALT              | 8/20                   | 2.2-44.5                                | 11/20                  | 3.4-54.8                                | 5/20                   | 29.5-56.3                               | 10/20                  | 43.4-123.7                              | 9/20                   | 38.8-190.4                              |
| ALS              | 1/20                   | 1.88                                    | 3/20                   | <LOQ                                    | 0/20                   | ND                                      | 4/20                   | 1.3-5.9                                 | 2/20                   | 4.3-8.1                                 |
| AFB <sub>1</sub> | 0/20                   | ND                                      |
| OTA              | 0/20                   | ND                                      |
| ZEN              | 0/20                   | ND                                      |

<sup>a</sup>: means not detected

Table S13. Comparison between the developed UHPLC–MS/MS method and the reference methods by using tomato sample No. 7,14 and 20 ( $\mu\text{g kg}^{-1}$ )

|                   | Samples | TeA | AOH                    | AME | ALT                     | AFB <sub>1</sub> | OTA | TEN                     | ALS                    | ZEN |
|-------------------|---------|-----|------------------------|-----|-------------------------|------------------|-----|-------------------------|------------------------|-----|
| Current method    | 7       |     | 3.05±0.08 <sup>a</sup> |     | 9.09±0.19 <sup>a</sup>  |                  |     |                         |                        |     |
|                   | 14      |     |                        |     | 7.65±0.27 <sup>a</sup>  |                  |     | 18.20±0.26 <sup>a</sup> |                        |     |
|                   | 20      |     |                        |     | 13.79±0.75 <sup>a</sup> |                  |     |                         | 1.88±0.12 <sup>a</sup> |     |
| Reference method* | 7       |     | 2.89±0.18 <sup>a</sup> |     | 9.28±0.97 <sup>a</sup>  |                  |     |                         |                        |     |
|                   | 14      |     |                        |     | 8.39±0.53 <sup>a</sup>  |                  |     | 17.09±1.14 <sup>a</sup> |                        |     |
|                   | 20      |     |                        |     | 13.62±3.06 <sup>a</sup> |                  |     |                         | 2.01±0.53 <sup>a</sup> |     |

\*Reference method: SN/T 4259-2015

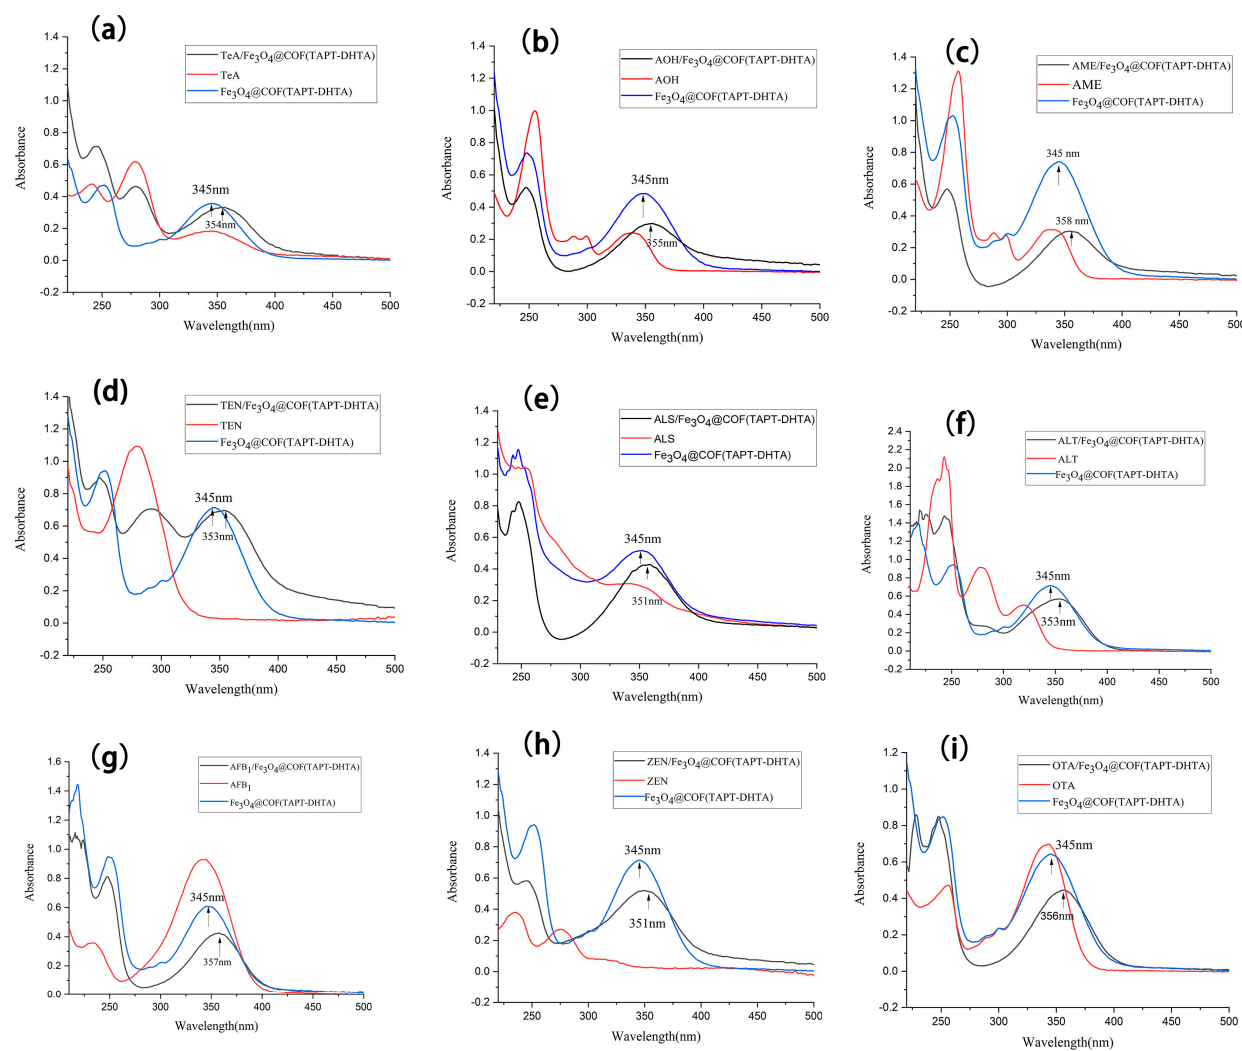

**Figure S1.** UV-Vis spectra of targeted mycotoxins, Fe<sub>3</sub>O<sub>4</sub>@COF(TAPT-DHTA) and mycotoxin/Fe<sub>3</sub>O<sub>4</sub>@COF(TAPT-DHTA)

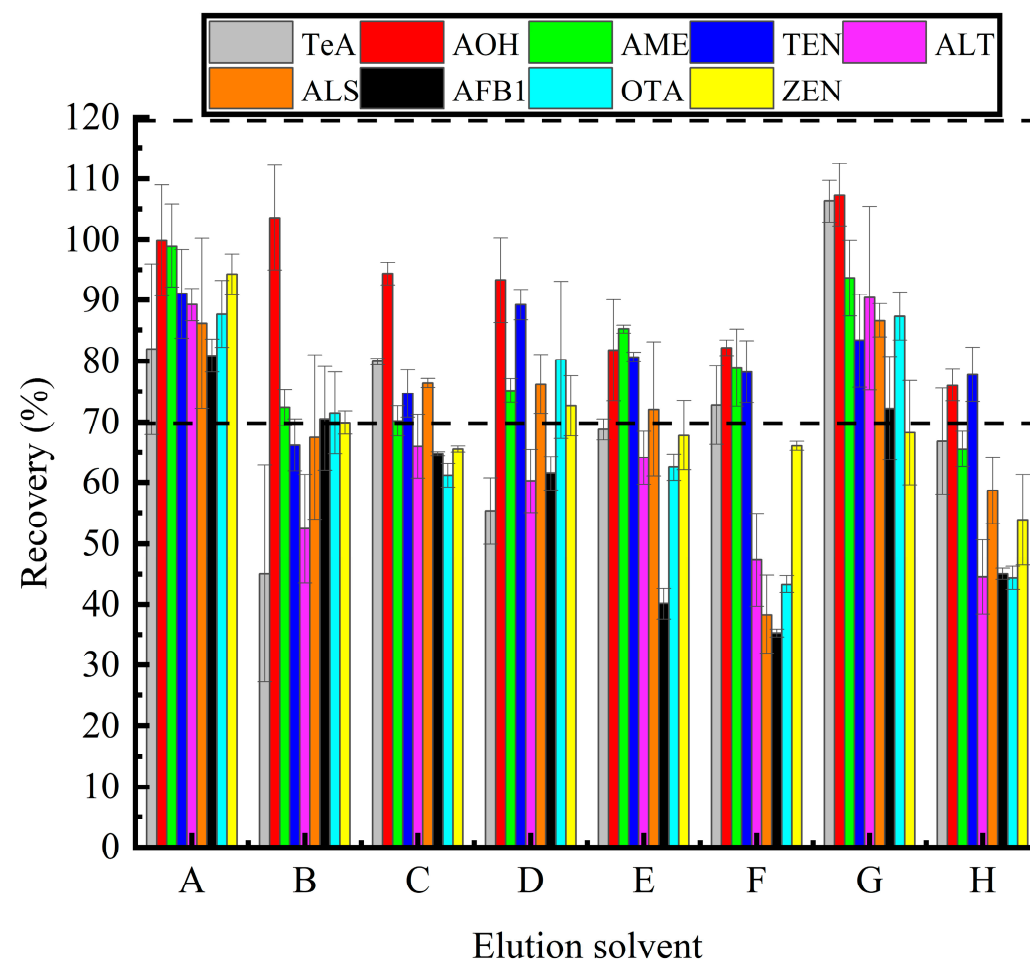

**Figure S2.** Comparison of the purification efficiency of 9 mycotoxins in the spiked tomato sample by 8 candidate elution solutions, (A) Methanol, (B) Acetonitrile, (C) Methanol/Formic acid (99/1), (D) Acetonitrile/Formic acid (99/1), (E) Methanol/Acetonitrile/Formic acid (50/49/1), (F) Methanol/Acetonitrile/Ammonium hydroxide (50/49/1), (G) Methanol/Acetonitrile/Formic acid (80/19/1), (H) Methanol/Acetonitrile/Ammonium hydroxide (80/19/1)

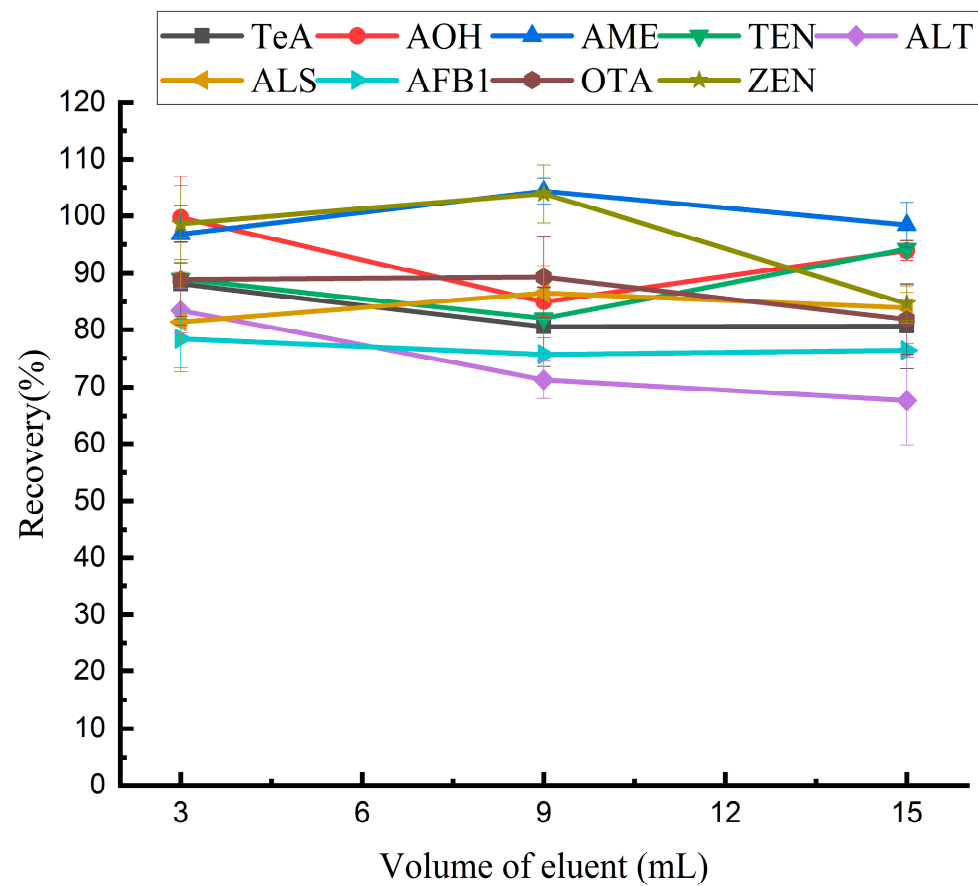

Figure S3. Effects of eluent volume on Fe<sub>3</sub>O<sub>4</sub>@COF (TAPT-DHTA) MSPE process



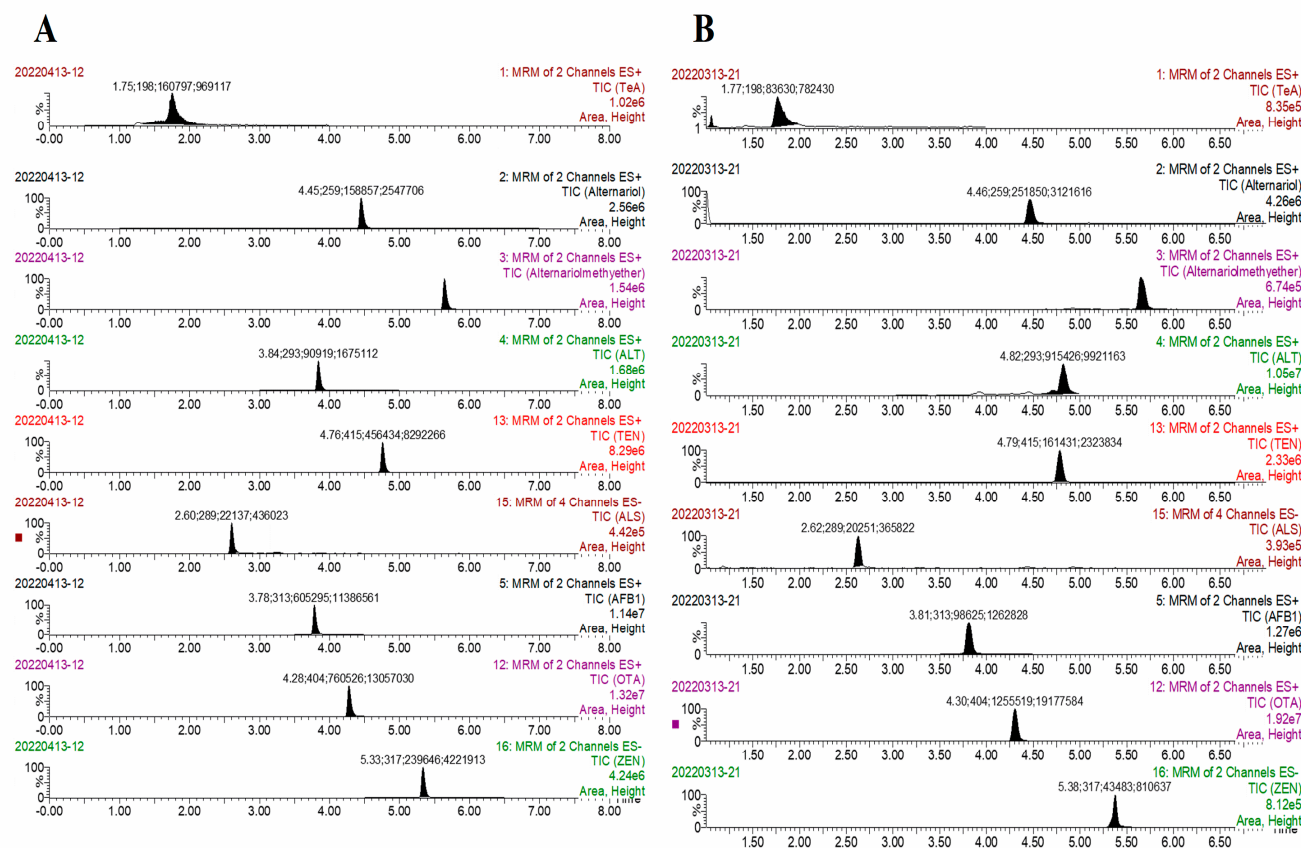

**Figure S4.** MRM chromatography of 9 mycotoxins in (A) solvent standard solution and (B) matrix standard solution ( $100 \mu\text{g kg}^{-1}$ ). The retention time of peak corresponding to each toxin were as follow: TeA (1.75), AOH (4.45), AME (5.65), ALT (3.64), TEN (4.76), ALS (2.62), AFB<sub>1</sub> (3.78), OTA (4.28), ZEN (5.33)

## References

1. Zhao, Y.; Wan, L.H.; Bai, X.L.; Liu, Y.M.; Zhang, F.P.; Liu, Y.M.; Liao, X. Quantification of mycotoxins in vegetable oil by UPLC-MS/MS after magnetic solid-phase extraction. *Food Addit. Contam.* **2017**, *34*, 1201–1210. <https://doi.org/10.1080/19440049.2017.1319074>.

2. Xu, H.W.; Sun, J.D.; Wang, H.M.; Zhang, Y.Z.; Sun, X.L. Adsorption of aflatoxins and ochratoxins in edible vegetable oils with dopamine-coated magnetic multi-walled carbon nanotubes. *Food Chem.* **2021**, *365*, 130409. <https://doi.org/10.1016/j.foodchem.2021.130409>.
3. Li, W.K.; Zhang, H.X.; Shi, Y.P. Simultaneous determination of aflatoxin B<sub>1</sub> and zearalenone by magnetic nanoparticle filled amino-modified multi-walled carbon nanotubes. *Anal. Methods* **2018**, *10*, 3353–3363. <https://doi.org/10.1039/C8AY00815A>.
4. Tang, Z.T.; Han, Q.R.; Yu, G.; Liu, F.; Tan, Y.Z.; Peng, C. Fe<sub>3</sub>O<sub>4</sub>@PDA/MIL-101(Cr) as magnetic solid-phase extraction sorbent for mycotoxins in licorice prior to ultrahigh-performance liquid chromatography-tandem mass spectrometry analysis. *Food Sci. Nutr.* **2022**, *10*, 2224–2235. <https://doi.org/10.1002/fsn3.2832>.
5. Wang, C.; Fan, Y.; He, W.; Hu, D.; Wu, A.; Wu, W. Development and Application of a QuEChERS-Based Liquid Chromatography Tandem Mass Spectrometry Method to Quantitate Multi-Component Alternaria Toxins in Jujube. *Toxins* **2018**, *10*, 382. <https://doi.org/10.3390/toxins10100382>.
6. De Berardis, S.; De Paola, E.L.; Montevecchi, G.; Garbini, D.; Masino, F.; Antonelli, A.; Melucci, D. Determination of four alternaria alternata mycotoxins by QuEChERS approach coupled with liquid chromatography-tandem mass spectrometry in tomato-based and fruit-based products. *Food Res. Int.* **2018**, *106*, 677–685. <https://doi.org/10.1016/j.foodres.2018.01.032>.
7. Xing, L.J.; Zou, L.J.; Luo, R.F.; Wang, Y. Determination of five Alternaria toxins in wolfberry using modified QuEChERS and ultra-high performance liquid chromatography-tandem mass spectrometry. *Food Chem.* **2020**, *311*, 125975. <https://doi.org/10.1016/j.foodchem.2019.125975>.
